# Supplementary material
Source: publisher figshare collection journal article supplement (https://gsajournals.figshare.com/ndownloader/files/22543952)
Supplement: Supplementary file 1 [file 22543952]

## Sheet: Sheet1
FlyBase ID	Gene Symbol	Gene Name	Biological Process Gene Ontology	Cellular Component Gene Ontology	Molecular Function Gene Ontology	Human Orthologs (DIOPT ≥ 3)	Human Disease Model
FBgn0032512	Bdp1	B double prime 1	RNA polymerase III preinitiation complex assembly ; GO:0070898	transcription factor TFIIIB complex ; GO:0000126	TFIIIC-class transcription factor complex binding ; GO:0001156 | RNA polymerase III type 3 promoter sequence-specific DNA binding ; GO:0001006	BDP1	DEAFNESS, AUTOSOMAL RECESSIVE 112; DFNB112
FBgn0030954	CCKLR-17D3	Cholecystokinin-like receptor at 17D3	G protein-coupled receptor signaling pathway; GO:0007186 | adult locomotory behavior ; GO:0008344	integral component of membrane ; GO:0016021 |	gastrin receptor activity ; GO:0015054 | G protein-coupled receptor activity ; GO:0004930 | neuropeptide receptor activity ; GO:0008188	CCKAR, CCKBR
FBgn0036212	CG11597	CG11597	peptidyl-serine dephosphorylation ; GO:0070262 | protein dephosphorylation ; GO:0006470	cytoplasm ; GO:0005737 | nucleus ; GO:0005634 | protein phosphatase type 2A complex ; GO:0000159	protein serine/threonine phosphatase activity ; GO:0004722	PPP2CB, PPP4C, PPP6C, PPP2CA,	NEURODEVELOPMENTAL DISORDER AND LANGUAGE DELAY WITH OR WITHOUT STRUCTURAL BRAIN ABNORMALITIES; NEDLBA
FBgn0033579	CG13229	CG13229	G protein-coupled receptor signaling pathway ; GO:0007186	integral component of membrane ; GO:0016021	G protein-coupled peptide receptor activity ; GO:0008528 | neuropeptide receptor activity ; GO:0008188 | G protein-coupled receptor activity ; GO:0004930	GPR139
FBgn0039428	CG14237	CG14237	-	-	-	-
FBgn0039429	CG14238	CG14238	-	-	-	TMEM26
FBgn0031602	CG15431	CG15431	-	-	-	-
FBgn0036454	CG17839	CG17839	-	sarcomere ; GO:0030017 | nucleus ; GO:0005634	-	-
FBgn0051221	CG31221	CG31221	-	-	-
FBgn0052038	CG3208 / RhoGAP5A	Rho GTPase activating protein at 5A	compound eye development | imaginal disc-derived leg morphogenesis | negative regulation of adherens junction organization | negative regulation of epidermal growth factor receptor signaling pathway | negative regulation of ERK1 and ERK2 cascade | positive regulation of GTPase activity | regulation of GTPase activity | regulation of small GTPase mediated signal transduction		GTPase activator activity	CHN1, CHN2, ARHGAP29	DUANE RETRACTION SYNDROME 2; DURS2
FBgn0053181	CG33181	CG33181	cation transport ; GO:0006812	plasma membrane ; GO:0005886	cation transmembrane transporter activity ; GO:0008324	SLC41A1, SLC41A3, SLC41A2
FBgn0053926	CG33926	CG33926	-	-	-	-
FBgn0263117	CG34377	CG34377	-	-	-	SAMSN1, SASH3, SASH1, SAMD5	DYSCHROMATOSIS UNIVERSALIS HEREDITARIA 1; DUH1 | CANCER, ALOPECIA, PIGMENT DYSCRASIA, ONYCHODYSTROPHY, AND KERATODERMA; CAPOK
FBgn0085430	CG34401	CG34401	regulation of axon guidance ; GO:1902667	Cul2-RING ubiquitin ligase complex ; GO:0031462	zinc ion binding ; GO:0008270	ZSWIM8
FBgn0035996	CG3448	CG3448	DNA recombination ; GO:0006310 | positive regulation of ligase activity ; GO:0051351 | response to X-ray ; GO:0010165 | double-strand break repair via nonhomologous end joining ; GO:0006303 | DNA ligation involved in DNA repair ; GO:0051103	DNA-dependent protein kinase-DNA ligase 4 complex ; GO:0005958 | DNA ligase IV complex ; GO:0032807	DNA binding ; GO:0003677
FBgn0035995	CG3529	CG3529	intracellular protein transport ; GO:0006886	intracellular ; GO:0005622	-	TOM1L1, TOM1, TOM1L2
FBgn0261551	CG42669	CG42669
FBgn0261569	CG42683	CG42683
FBgn0264090	CG43759	CG43759	-	-	-	-
FBgn0034266	CG4975	CG4975	-	cytosol ; GO:0005829	-	ATXN10	SPINOCEREBELLAR ATAXIA 10; SCA10
FBgn0034267	CG4984	CG4984	-	integral component of membrane ; GO:0016021 | plasma membrane ; GO:0005886	-
FBgn0036211	CG5946	CG5946	oxidation-reduction process ; GO:0055114 | retrograde vesicle-mediated transport, Golgi to endoplasmic reticulum ; GO:0006890 | regulation of lipid storage ; GO:0010883	endomembrane system ; GO:0012505 | COPI vesicle coat ; GO:0030126	FAD binding ; GO:0071949 | cytochrome-b5 reductase activity, acting on NAD(P)H ; GO:0004128	CYB5R3, CYB5R2, CYB5R1	METHEMOGLOBINEMIA DUE TO DEFICIENCY OF METHEMOGLOBIN REDUCTASE
FBgn0027583	CG7601	CG7601	-	-	oxidoreductase activity ; GO:0016491 | inferred from electronic annotation with InterPro:IPR020904	RDH8, DHRS7B, DHRS7C,
FBgn0029939	CG9650	CG9650	negative regulation of peptide hormone secretion ; GO:0090278 | multicellular organism development ; GO:0007275 | regulation of transcription, DNA-templated ; GO:0006355	cytosol ; GO:0005829 | nucleus ; GO:0005634	DNA-binding transcription factor activity ; GO:0003700 | sequence-specific DNA binding ; GO:0043565	BCL11A, BCL11B , ZNF296	INTELLECTUAL DEVELOPMENTAL DISORDER WITH SPEECH DELAY, DYSMORPHIC FACIES, AND T-CELL ABNORMALITIES; IDDSFTA | IMMUNODEFICIENCY 49; IMD49 | INTELLECTUAL DEVELOPMENTAL DISORDER WITH PERSISTENCE OF FETAL HEMOGLOBIN
FBgn0263132	Cht6	Chitinase 6	carbohydrate metabolic process ; GO:0005975 | ecdysis, chitin-based cuticle ; GO:0018990 | chitin catabolic process ; GO:0006032	extracellular region ; GO:0005576 | cytoplasm ; GO:0005737	chitinase activity ; GO:0004568 | chitin binding ; GO:0008061	CHI3L1, CHIT1, OVGP1, CHIA, CHI3L2	CHITOTRIOSIDASE DEFICIENCY; CHITD | ASTHMA-RELATED TRAITS, SUSCEPTIBILITY TO, 7; ASRT7 | SCHIZOPHRENIA; SCZD
FBgn0039689	CIA30	Complex I intermediate-associated protein, 30 kDa	mitochondrion organization ; GO:0007005 | mitochondrial electron transport, NADH to ubiquinone ; GO:0006120 | response to heat ; GO:0009408 | mitochondrial respiratory chain complex I assembly ; GO:0032981 | response to hypoxia ; GO:0001666 | NADH dehydrogenase complex assembly ; GO:0010257 | oxidative phosphorylation ; GO:0006119 | response to hyperoxia ; GO:0055093 | mitochondrial electron tran…	mitochondrion ; GO:0005739 | oxidoreductase complex ; GO:1990204 | mitochondrial respiratory chain complex I ; GO:0005747	unfolded protein binding ; GO:0051082 |	NDUFAF1	MITOCHONDRIAL COMPLEX I DEFICIENCY, NUCLEAR TYPE 11; MC1DN11
FBgn0051708	DIP-zeta	Dpr-interacting protein zeta	synapse organization ; GO:0050808	integral component of plasma membrane ; GO:0005887 | neuron projection ; GO:0043005	-	NTM, IGLON5, LSAMP, NEGR1, OPCML	OVARIAN CANCER
FBgn0085369	Drgx	Dorsal root ganglia homeobox	regulation of transcription, DNA-templated ; GO:0006355	nucleus ; GO:0005634	DNA-binding transcription factor activity, RNA polymerase II-specific ; GO:0000981 | RNA polymerase II regulatory region sequence-specific DNA binding ; GO:0000977	DRGX, PHOX2B, PHOX2A, ALX3	FRONTONASAL DYSPLASIA 1; FND1 | FIBROSIS OF EXTRAOCULAR MUSCLES, CONGENITAL, 2; CFEOM2 | NEUROBLASTOMA, SUSCEPTIBILITY TO, 2; NBLST2 | CENTRAL HYPOVENTILATION SYNDROME, CONGENITAL; CCHS
FBgn0026439	Eaat1	Excitatory amino acid transporter 1	regulation of excitatory postsynaptic membrane potential involved in skeletal muscle contraction ; GO:0014853 | larval locomotory behavior ; GO:0008345 | L-glutamate transmembrane transport ; GO:0015813 | determination of adult lifespan ; GO:0008340 | adult locomotory behavior ; GO:0008344 | aspartate transmembrane transport ; GO:0015810 | chemical synaptic transmission ; GO:0007268	integral component of membrane ; GO:0016021 | neuromuscular junction ; GO:0031594 | integral component of membrane ; GO:0016021 | neuron projection ; GO:0043005 | plasma membrane ; GO:0005886 | terminal bouton ; GO:0043195	L-glutamate transmembrane transporter activity ; GO:0005313 | glutamate:sodium symporter activity ; GO:0015501 | L-aspartate transmembrane transporter activity ; GO:0015183	SLC1A6, SLC1A4, SLC1A1, SLC1A3, SLC1A2, SLC1A5, SLC1A7	EPISODIC ATAXIA, TYPE 6; EA6 | DICARBOXYLIC AMINOACIDURIA; DCBXA | SCHIZOPHRENIA 18; SCZD18 | SPASTIC TETRAPLEGIA, THIN CORPUS CALLOSUM, AND PROGRESSIVE MICROCEPHALY; SPATCCM | EPILEPTIC ENCEPHALOPATHY, EARLY INFANTILE, 41; EIEE41
FBgn0000721	for	foraging	regulation of heart contraction ; GO:0008016 | motor neuron axon guidance ; GO:0008045 | regulation of response to food ; GO:0032095 | larval feeding behavior ; GO:0030536 | short-term memory ; GO:0007614 | protein phosphorylation ; GO:0006468 | feeding behavior ; GO:0007631 | response to sucrose ; GO:0009744 | long-term memory ; GO:0007616 | larval locomotory behavior ; GO:0008345 | habituation …	plasma membrane ; GO:0005886 | cytosol ; GO:0005829 | cytoplasm ; GO:0005737	ATP binding ; GO:0005524 | cGMP-dependent protein kinase activity ; GO:0004692	PRKG2, PRKG1	AORTIC ANEURYSM, FAMILIAL THORACIC 8; AAT8
FBgn0032117	FucTB	alpha1,3-fucosyltransferase B	protein glycosylation ; GO:0006486 | fucosylation ; GO:0036065	Golgi membrane ; GO:0000139	alpha-(1->3)-fucosyltransferase activity ; GO:0046920	FUT10, FUT6, FUT11	FUCOSYLTRANSFERASE 6 DEFICIENCY
FBgn0001098	Gdh	Glutamate dehydrogenase	NADH oxidation ; GO:0006116 | glutamate metabolic process ; GO:0006536 | glutamate catabolic process to 2-oxoglutarate ; GO:0019551 | sperm storage ; GO:0046693 | glutamate catabolic process ; GO:0006538	mitochondrion ; GO:0005739 | mitochondrion ; GO:0005739 | cytoplasm ; GO:0005737 | cytosol ; GO:0005829 | mitochondrial matrix ; GO:0005759	glutamate dehydrogenase (NAD+) activity ; GO:0004352 | identical protein binding ; GO:0042802 | glutamate dehydrogenase [NAD(P)+] activity ; GO:0004353	GLUD2, GLUD1	HYPERINSULINEMIC HYPOGLYCEMIA, FAMILIAL, 6; HHF6 | PARKINSON DISEASE, LATE-ONSET; PD
FBgn0050115	GEFmeso	Guanine nucleotide exchange factor in mesoderm	imaginal disc-derived leg morphogenesis ; GO:0007480 | regulation of Cdc42 protein signal transduction ; GO:0032489 | imaginal disc-derived wing vein specification ; GO:0007474	-	Rho guanyl-nucleotide exchange factor activity ; GO:0005089 | Ral GTPase binding ; GO:0017160	PLEKHG2, PLEKHG3, PLEKHG1	LEUKODYSTROPHY AND ACQUIRED MICROCEPHALY WITH OR WITHOUT DYSTONIA; LDAMD
FBgn0036144	GlcAT-P	Glucuronyltransferase P	cellular glucuronidation ; GO:0052695 | glycosphingolipid biosynthetic process ; GO:0006688 | carbohydrate metabolic process ; GO:0005975 | peripheral nervous system development ; GO:0007422 | glycoprotein biosynthetic process ; GO:0009101 | chondroitin sulfate proteoglycan biosynthetic process ; GO:0050650 | proteoglycan biosynthetic process ; GO:0030166	Golgi membrane ; GO:0000139 | Golgi apparatus ; GO:0005794	N-acetyllactosamine beta-1,3-glucuronosyltransferase activity ; GO:0046987 | galactosyl beta-1,3 N-acetylgalactosamine beta-1,3-glucuronosyltransferase activity ; GO:0046989 | galactosylgalactosylxylosylprotein 3-beta-glucuronosyltransferase activity ; GO:0015018 | asioloorosomucoid beta-1,3-glucuronosyltransferase activity ; GO:0046988 | glucuronosyltransferase activity ; GO:0015020 | galactosyl…	Hsap\B3GAT2 <newline> Hsap\B3GAT3 <newline> Hsap\B3GAT1 <newline> Hsap\C9orf139
FBgn0026239	gukh	GUK-holder	actin cytoskeleton organization ; GO:0030036 | protein localization ; GO:0008104 | axon guidance ; GO:0007411	cytoskeleton ; GO:0005856 | presynaptic membrane ; GO:0042734 | terminal bouton ; GO:0043195	protein binding ; GO:0005515	NHS	CATARACT 40; CTRCT40 | NANCE-HORAN SYNDROME; NHS
FBgn0031016	kek5	kekkon 5	negative regulation of BMP signaling pathway ; GO:0030514 | negative regulation of epidermal growth factor receptor signaling pathway ; GO:0042059	integral component of plasma membrane ; GO:0005887	-
FBgn0028369	kirre	kin of irre	nephrocyte filtration ; GO:0097206 | nephrocyte diaphragm assembly ; GO:0036059 | regulation of striated muscle tissue development ; GO:0016202 | compound eye morphogenesis ; GO:0001745 | myoblast fusion ; GO:0007520 | garland nephrocyte differentiation ; GO:0061321 | heterophilic cell-cell adhesion via plasma membrane cell adhesion molecules ; GO:0007157 | myoblast fusion ; GO:0007520 | homophil…	nephrocyte diaphragm ; GO:0005917 | integral component of plasma membrane ; GO:0005887 |cell-cell junction ; GO:0005911 | apical plasma membrane ; GO:0016324 |plasma membrane ; GO:0005886	protein binding ; GO:0005515 | cell adhesion molecule binding ; GO:0050839	KIRREL1, KIRREL2, KIRREL3
FBgn0039688	Kul	Kuzbanian-like	Notch signaling pathway ; GO:0007219 | positive regulation of Notch signaling pathway ; GO:0045747 | membrane protein ectodomain proteolysis ; GO:0006509 | membrane protein ectodomain proteolysis ; GO:0006509 | membrane protein ectodomain proteolysis ; GO:0006509y	integral component of membrane ; GO:0016021 |iplasma membrane ; GO:0005886	metalloendopeptidase activity ; GO:0004222 |	ADAM10, ADAM17	ALZHEIMER DISEASE 18; AD18 | RETICULATE ACROPIGMENTATION OF KITAMURA; RAK | INFLAMMATORY SKIN AND BOWEL DISEASE, NEONATAL, 1; NISBD1
FBgn0032633	Lrch	Leucine-rich-repeats and calponin homology domain protein	-	cell cortex ; GO:0005938 | cleavage furrow ; GO:0032154	-	LRCH3, LRCH4, LRCH2, LRCH1
FBgn0264695	Mhc	Myosin heavy chain	muscle contraction ; GO:0006936 | muscle organ development ; GO:0007517 | border follicle cell migration ; GO:0007298 | myofibril assembly ; GO:0030239 | regulation of myosin II filament assembly ; GO:0043520 | skeletal muscle myosin thick filament assembly ; GO:0030241 | epithelial cell migration, open tracheal system ; GO:0007427 | locomotion ; GO:0040011 | sarcomere organization ; GO:0045214 |…	myosin complex ; GO:0016459 | polytene chromosome puff ; GO:0005703 | striated muscle myosin thick filament ; GO:0005863 | sarcomere ; GO:0030017	ATP binding ; GO:0005524 | actin filament binding ; GO:0051015 | motor activity ; GO:0003774 |actin-dependent ATPase activity ; GO:0030898 | protein homodimerization activity ; GO:0042803 | structural constituent of muscle ; GO:0008307	MYH9, MYH1, MYH2, MYH4, MYH7B, MYH15, MYH7, MYH10, MYH11, MYH8, MYH6, MYH3, MYH14, MYH13	MYOPATHY, MYOSIN STORAGE, AUTOSOMAL RECESSIVE; MSMB | MYOPATHY, MYOSIN STORAGE, AUTOSOMAL DOMINANT; MSMA | CARDIOMYOPATHY, DILATED, 1S; CMD1S | SCAPULOPERONEAL MYOPATHY, MYH7-RELATED; SPMM | CARDIOMYOPATHY, FAMILIAL HYPERTROPHIC, 1; CMH1 | MYOPATHY, DISTAL, 1; MPD1 | CARDIOMYOPATHY, DILATED, 1EE; CMD1EE | SICK SINUS SYNDROME 3, SUSCEPTIBILITY TO; SSS3 | CARDIOMYOPATHY, FAMILIAL HYPERTROPHIC, 14; …
FBgn0263514	mir-4966-1	mir-4966-1 stem loop	-	-	-	-
FBgn0262228	mir-975	mir-975 stem loop	-	-	-	-
FBgn0262341	mir-976	mir-976 stem loop	-	-	-	-
FBgn0262251	mir-977	mir-977 stem loop	-	-	-	-
FBgn0259110	mmd	mind-meld	membrane protein ectodomain proteolysis ; GO:0006509	integral component of membrane ; GO:0016021	metalloendopeptidase activity ; GO:0004222	ADAM28, ADAM30, ADAM18, ADAM7, ADAM20, ADAM2, ADAM32, ADAM33, ADAM23, ADAMDEC1, ADAM21, ADAM29, ADAM11, ADAM19, ADAM22, ADAM15, ADAM12, ADAM9, ADAM8	EPILEPTIC ENCEPHALOPATHY, EARLY INFANTILE, 61; EIEE61 | CONE-ROD DYSTROPHY 9; CORD9
FBgn0050361	mtt	mangetout	adult feeding behavior ; GO:0008343 | response to insecticide ; GO:0017085 |phospholipase C-activating G protein-coupled receptor signaling pathway ; GO:0007200	integral component of plasma membrane ; GO:0005887 | dendrite ; GO:0030425 | integral component of membrane ; GO:0016021 | integral component of plasma membrane ; GO:0005887	G protein-coupled receptor activity ; GO:0004930	GRM6, GRM5, GRM8, GRM7, GRM1, GRM3, GRM2, GRM4	SPINOCEREBELLAR ATAXIA, AUTOSOMAL RECESSIVE 13; SCAR13 | SPINOCEREBELLAR ATAXIA 44; SCA44 | NIGHT BLINDNESS, CONGENITAL STATIONARY, TYPE 1B; CSNB1B
FBgn0032511	ND-B22	NADH dehydrogenase (ubiquinone) B22 subunit	mitochondrial electron transport, NADH to ubiquinone ; GO:0006120	mitochondrial respiratory chain complex I ; GO:0005747 |	NADH dehydrogenase activity ; GO:0003954	NDUFB9	MITOCHONDRIAL COMPLEX I DEFICIENCY, NUCLEAR TYPE 24; MC1DN24
FBgn0264975	Nrg	Neuroglian	septate junction assembly ; GO:0019991 | imaginal disc morphogenesis ; GO:0007560 |synapse organization ; GO:0050808 | axon extension ; GO:0048675 |establishment of glial blood-brain barrier ; GO:0060857 | regulation of female receptivity ; GO:0045924 |regulation of tube size, open tracheal system ; GO:0035151 |axonogenesis ; GO:0007409 | neuron cell-cell adhesion ; GO:0007158 | female courtship …	integral component of plasma membrane ; GO:0005887 | cytoneme ; GO:0035230 | septate junction ; GO:0005918 | neuron projection ; GO:0043005 | neuronal cell body ; GO:0043025 | plasma membrane ; GO:0005886 | dendrite ; GO:0030425 | axon ; GO:0030424 | pleated septate junction ; GO:0005919 | plasma membrane ; GO:0005886 | filopodium ; GO:0030175	cell adhesion molecule binding ; GO:0050839 | calcium ion binding ; GO:0005509	CHL1, NFASC, L1CAM, NRCAM	MASA SYNDROME | HYDROCEPHALUS DUE TO CONGENITAL STENOSIS OF AQUEDUCT OF SYLVIUS; HSAS | CORPUS CALLOSUM, PARTIAL AGENESIS OF, X-LINKED | NEURODEVELOPMENTAL DISORDER WITH CENTRAL AND PERIPHERAL MOTOR DYSFUNCTION; NEDCPMD
FBgn0003016	osp	outspread	-	-	-	MPRIP, TRIOBP	DEAFNESS, AUTOSOMAL RECESSIVE 28; DFNB28
FBgn0035975	PGRP-LA	Peptidoglycan recognition protein LA	peptidoglycan catabolic process ; GO:0009253 | innate immune response ; GO:0045087 | positive regulation of peptidoglycan recognition protein signaling pathway ; GO:0061059 | defense response to Gram-negative bacterium ; GO:0050829 | immune response ; GO:0006955 | response to bacterium ; GO:0009617	integral component of plasma membrane ; GO:0005887	zinc ion binding ; GO:0008270 | peptidoglycan binding ; GO:0042834 | N-acetylmuramoyl-L-alanine amidase activity ; GO:0008745	PGLYRP1, PGLYRP3, PGLYRP4
FBgn0003118	pnt	pointed	lymph gland crystal cell differentiation ; GO:0035170 | positive regulation of transcription by RNA polymerase II ; GO:0045944 | ommatidial rotation ; GO:0016318 | positive regulation of cell population proliferation ; GO:0008284 | regulation of neuron differentiation ; GO:0045664 | regulation of neuroblast proliferation ; GO:1902692 | wing disc dorsal/ventral pattern formation ; GO:0048190 | mus…	nucleus ; GO:0005634 | nucleus ; GO:0005634	DNA-binding transcription activator activity, RNA polymerase II-specific ; GO:0001228 | sequence-specific DNA binding ; GO:0043565 | protein binding ; GO:0005515 | DNA-binding transcription factor activity, RNA polymerase II-specific ; GO:0000981 | transcription regulatory region DNA binding ; GO:0044212	ETS2, ETS1
FBgn0039424	ppk15	pickpocket 15	sodium ion transport ; GO:0006814	integral component of membrane ; GO:0016021	sodium channel activity ; GO:0005272	ASIC1, ASIC3, ASIC4, ASIC5
FBgn0036030	Prps	Phosphoribosyl pyrophosphate synthetase	ribonucleoside monophosphate biosynthetic process ; GO:0009156 | nucleoside metabolic process ; GO:0009116 | nucleotide biosynthetic process ; GO:0009165 | phosphoribose 1-diphosphate biosynthetic process ; GO:0006015 | purine nucleotide biosynthetic process ; GO:0006164	cytoplasm ; GO:0005737 | ribose phosphate diphosphokinase complex ; GO:0002189	magnesium ion binding ; GO:0000287 | ATP binding ; GO:0005524 | ribose phosphate diphosphokinase activity ; GO:0004749	PRPS1, PRPS2, PRPS1L1	CHARCOT-MARIE-TOOTH DISEASE, X-LINKED RECESSIVE, 5; CMTX5 | PHOSPHORIBOSYLPYROPHOSPHATE SYNTHETASE SUPERACTIVITY | ARTS SYNDROME; ARTS | DEAFNESS, X-LINKED 1; DFNX1
FBgn0264598	PsGEF	Protostome-specific GEF	regulation of Rho protein signal transduction ; GO:0035023 | mushroom body development ; GO:0016319 | positive regulation of ruffle assembly ; GO:1900029 | calcium-ion regulated exocytosis ; GO:0017156 | cellular response to calcium ion ; GO:0071277 | regulation of calcium ion-dependent exocytosis ; GO:0017158 | positive regulation of Rac protein signal transduction ; GO:0035022 | vesicle fusion …	exocytic vesicle ; GO:0070382 | axon ; GO:0030424 | cytoplasm ; GO:0005737 | synapse ; GO:0045202 | plasma membrane ; GO:0005886 | neuron projection ; GO:0043005	Rho guanyl-nucleotide exchange factor activity ; GO:0005089 | phosphatidylserine binding ; GO:0001786 | Rho guanyl-nucleotide exchange factor activity ; GO:0005089 | clathrin binding ; GO:0030276 | SNARE binding ; GO:0000149 | calcium-dependent phospholipid binding ; GO:0005544 | calcium ion binding ; GO:0005509
FBgn0004370	Ptp10D	Protein tyrosine phosphatase 10D	axon guidance ; GO:0007411 | long-term memory ; GO:0007616 | negative regulation of epidermal growth factor receptor signaling pathway ; GO:0042059 | branching involved in open tracheal system development ; GO:0060446 | protein dephosphorylation ; GO:0006470 | open tracheal system development ; GO:0007424 | central nervous system development ; GO:0007417 | motor neuron axon guidance ; GO:0008045 …	apical part of cell ; GO:0045177 | axon ; GO:0030424	transmembrane receptor protein tyrosine phosphatase activity ; GO:0005001 | protein tyrosine phosphatase activity ; GO:0004725	PTPRO, PTPRB, PTPRH, PTPRJ	COLORECTAL CANCER; CRC | NEPHROTIC SYNDROME, TYPE 6; NPHS6
FBgn0004369	Ptp99A	Protein tyrosine phosphatase 99A	protein dephosphorylation ; GO:0006470 | motor neuron axon guidance ; GO:0008045 | motor neuron axon guidance ; GO:0008045 |peptidyl-tyrosine dephosphorylation ; GO:0035335 | axonal defasciculation ; GO:0007414 |defasciculation of motor neuron axon ; GO:0007415	plasma membrane ; GO:0005886 | axon ; GO:0030424	protein tyrosine phosphatase activity ; GO:0004725 | transmembrane receptor protein tyrosine phosphatase activity ; GO:0005001 | protein tyrosine phosphatase activity ; GO:0004725 | protein tyrosine phosphatase activity ; GO:0004725	PTPRZ1, PTPRG
FBgn0011828	Pxn	Peroxidasin	oxidation-reduction process ; GO:0055114 |response to oxidative stress ; GO:0006979 | phagocytosis ; GO:0006909 | basement membrane assembly ; GO:0070831 | extracellular matrix organization ; GO:0030198 | collagen fibril organization ; GO:0030199	extracellular space ; GO:0005615 | extracellular matrix ; GO:0031012 | collagen-containing extracellular matrix ; GO:0062023	heme binding ; GO:0020037 | peroxidase activity ; GO:0004601 | bromide peroxidase activity ; GO:0019806	MPO, EPX, PXDN, PXDNL, LPO, TPO	ANTERIOR SEGMENT DYSGENESIS 7; ASGD7 | EOSINOPHIL PEROXIDASE DEFICIENCY; EPXD | ALZHEIMER DISEASE; AD | MYELOPEROXIDASE DEFICIENCY; MPOD | THYROID DYSHORMONOGENESIS 2A; TDH2A
FBgn0036213	RpL10Ab	Ribosomal protein L10Ab	translation ; GO:0006412 | cytoplasmic translation ; GO:0002181 | maturation of LSU-rRNA ; GO:0000470	cytosolic large ribosomal subunit ; GO:0022625	structural constituent of ribosome ; GO:0003735 |RNA binding ; GO:0003723	RPL10A
FBgn0011232	scat	scattered	Golgi to vacuole transport ; GO:0006896 | spermatid nucleus elongation ; GO:0007290 | sperm individualization ; GO:0007291 | endocytic recycling ; GO:0032456 | acrosome assembly ; GO:0001675 | retrograde transport, endosome to Golgi ; GO:0042147 | Golgi to vacuole transport ; GO:0006896	GARP complex ; GO:0000938 | Golgi apparatus ; GO:0005794 | Golgi trans cisterna ; GO:0000138	syntaxin binding ; GO:0019905	VPS54
FBgn0263289	scrib	scribble	cell fate commitment involved in pattern specification ; GO:0060581 | regulation of synapse structure or activity ; GO:0050803 | compound eye development ; GO:0048749 | olfactory behavior ; GO:0042048 | cell fate specification ; GO:0001708 | negative regulation of epithelial cell proliferation ; GO:0050680 |dorsal closure ; GO:0007391 | Malpighian tubule development ; GO:0072002 | memory ; GO:000…	postsynaptic membrane ; GO:0045211 | basolateral plasma membrane ; GO:0016323 | cell-cell junction ; GO:0005911 | septate junction ; GO:0005918 | cell junction ; GO:0030054 | basolateral plasma membrane ; GO:0016323 | ionotropic glutamate receptor complex ; GO:0008328 | septate junction ; GO:0005918 | postsynaptic density ; GO:0014069 |synapse ; GO:0045202 | synaptic membrane ; GO:0097060 | neuro…	protein binding ; GO:0005515	LRRC7, SCRIB, LRRC1
FBgn0261439	SdhA	Succinate dehydrogenase, subunit A (flavoprotein)	mitochondrial electron transport, succinate to ubiquinone ; GO:0006121 | tricarboxylic acid cycle ; GO:0006099 | electron transport chain ; GO:0022900	mitochondrial respiratory chain complex II, succinate dehydrogenase complex (ubiquinone) ; GO:0005749 | mitochondrion ; GO:0005739	flavin adenine dinucleotide binding ; GO:0050660 | oxidoreductase activity ; GO:0016491 | succinate dehydrogenase (ubiquinone) activity ; GO:0008177 | succinate dehydrogenase (ubiquinone) activity ; GO:0008177 | succinate dehydrogenase activity ; GO:0000104 | electron transfer activity ; GO:0009055	SDHA	CARDIOMYOPATHY, DILATED, 1GG; CMD1GG | MITOCHONDRIAL COMPLEX II DEFICIENCY | PARAGANGLIOMAS 5; PGL5 | LEIGH SYNDROME; LS
FBgn0250876	Sema-5C	Semaphorin 5c	central complex development | embryonic development via the syncytial blastoderm | olfactory behavior			SEMA5A, SEMA5B
FBgn0259958	Sfp24F	Seminal fluid protein 24F	multicellular organism reproduction ; GO:0032504	extracellular space ; GO:0005615	carbohydrate binding ; GO:0030246
FBgn0003396	shn	schnurri	positive regulation of transcription by RNA polymerase II ; GO:0045944 |imaginal disc-derived wing vein morphogenesis ; GO:0008586 | dorsal closure ; GO:0007391 | midgut development ; GO:0007494 | BMP signaling pathway ; GO:0030509 | wing disc dorsal/ventral pattern formation ; GO:0048190 | dorsal/ventral pattern formation ; GO:0009953 | mesoderm development ; GO:0007498 | negative regulation of …	RNA polymerase II transcription repressor complex ; GO:0090571 | nucleus ; GO:0005634 |	zinc ion binding ; GO:0008270 | nucleic acid binding ; GO:0003676 | transcription coactivator activity ; GO:0003713 | transcription corepressor activity ; GO:0003714 | RNA polymerase II activating transcription factor binding ; GO:0001102 | DNA-binding transcription factor activity, RNA polymerase II-specific ; GO:0000981	HIVEP1, HIVEP3, HIVEP2	MENTAL RETARDATION, AUTOSOMAL DOMINANT 43; MRD43
FBgn0019890	Smg5	Smg5 nonsense mediated mRNA decay factor	RNA interference ; GO:0016246 | telomere maintenance via telomerase ; GO:0007004 | nuclear-transcribed mRNA catabolic process, nonsense-mediated decay ; GO:0000184 | gene silencing by miRNA ; GO:0035195 | regulation of telomere maintenance via telomerase ; GO:0032210	telomerase holoenzyme complex ; GO:0005697 cytoplasm ; GO:0005737	telomerase RNA binding ; GO:0070034 | telomeric DNA binding ; GO:0042162	SMG5
FBgn0083015	snoRNA:Psi18S-920	snoRNA:Psi18S-920	-	-	-	-
FBgn0014388	sty	sprouty	negative regulation of torso signaling pathway ; GO:0120177 | regulation of compound eye photoreceptor development ; GO:0045314 | negative regulation of epidermal growth factor receptor signaling pathway ; GO:0042059 | animal organ development ; GO:0048513 | negative regulation of imaginal disc-derived wing vein specification ; GO:0110109 | dorsal/ventral axis specification, ovarian follicular ep…	apical part of cell ; GO:0045177 | cytoplasmic side of plasma membrane ; GO:0009898 | plasma membrane ; GO:0005886 | cytosol ; GO:0005829	-	SPRY2, SPRY1, SPRY3, SPRY4	IgA NEPHROPATHY, SUSCEPTIBILITY TO, 3; IGAN3 | HYPOGONADOTROPIC HYPOGONADISM 17 WITH OR WITHOUT ANOSMIA; HH17
FBgn0261793	Trf2	TATA box binding protein-related factor 2	DNA-templated transcription, initiation ; GO:0006352 | response to ecdysone ; GO:0035075 | pupal development ; GO:0035209 | salivary gland cell autophagic cell death ; GO:0035071 | positive regulation of transcription by RNA polymerase II ; GO:0045944 | transcription initiation from RNA polymerase II promoter ; GO:0006367 |transcription by RNA polymerase II ; GO:0006366 | spiracle morphogenesis, …	female germ cell nucleus ; GO:0001674 | nucleus ; GO:0005634 | transcription factor complex ; GO:0005667 | transcription factor TFIID complex ; GO:0005669 | polytene chromosome ; GO:0005700 male germ cell nucleus ; GO:0001673	TFIIA-class transcription factor complex binding ; GO:0001092 | DNA-binding transcription factor activity ; GO:0003700 | RNA polymerase II core promoter sequence-specific DNA binding ; GO:0000979 | transcription factor binding ; GO:0008134 | chromatin binding ; GO:0003682 | DNA-binding transcription factor activity ; GO:0003700 | RNA polymerase II cis-regulatory region sequence-specific DNA bindi…	TBPL1
FBgn0259789	zld	zelda	regulation of gene expression ; GO:0010468 | positive regulation of neuroblast proliferation ; GO:0002052 | regulation of transcription, DNA-templated ; GO:0006355 | dsDNA loop formation ; GO:0090579 | positive regulation of transcription, DNA-templated ; GO:0045893 | mitotic cell cycle ; GO:0000278 | cellularization ; GO:0007349	nucleoplasm ; GO:0005654 | nucleus ; GO:0005634 |chromatin ; GO:0000785 |	sequence-specific DNA binding ; GO:0043565 | protein binding ; GO:0005515 |transcription regulatory region sequence-specific DNA binding ; GO:0000976
FBgn0052311	zormin	zormin	-	Z disc ; GO:0030018 | M band ; GO:0031430 |	actin binding ; GO:0003779 | protein binding ; GO:0005515
